# Supplementary material
Source: publisher site journal article supplement (https://www.dovepress.com/article/315306)

**Table S1** The distributions of variables with missing data and the multiple imputation data

| Variables       |                                   | Number (%)<br>with missing data | Complete case           | Multiple imputation    |
|-----------------|-----------------------------------|---------------------------------|-------------------------|------------------------|
| Biochemistry    | AST (U/L)                         | 1 (0.9)                         | 146.00 [69.00, 272.00]  | 146.00 [67.00-272.00]  |
|                 | ALT (U/L)                         | 1 (0.9)                         | 133.00 [66.00, 263.00]  | 133.00 [64.00-263.00]  |
|                 | ALP (U/L)                         | 1 (0.9)                         | 224.00 [143.00, 356.00] | 224.00 [143.00-368.00] |
|                 | Bilirubin (mg/dL)                 | 2 (1.9)                         | 5.25 [2.90, 8.00]       | 5.30 [2.90-8.00]       |
|                 | Albumin (g/dl)                    | 32 (30.2)                       | 2.82 (0.57)             | 2.84 (0.83)            |
|                 | Lactate (mmol/L)                  | 23 (21.7)                       | 2.10 [1.35, 3.55]       | 2.10 [1.20-3.70]       |
| Organ failure   | Respiratory dysfunction,<br>n (%) | 62 (58.5)                       | 38 (86.4)               | 370 (69.81)            |
|                 | Number of organ failures          | 62 (58.5)                       | 4.00 [2.00, 4.00]       | 3.00 [2.00-4.00]       |
| Severity scores | SOFA                              | 65 (61.3)                       | 14.00 [12.00, 17.00]    | 13.48 [10.86-15.95]    |

**Notes:** data presented are mean  $\pm$  SD, median (Q1–Q3), or N (%).

**Abbreviations:** ALT, alanine aminotransferase; AST, aspartate aminotransferase; ALP, alkaline phosphatase; SOFA, Sequential Organ Failure Assessment.

**Table S2** Multivariable linear regression models evaluating the association between timing of biliary drainage and length of stay in-hospital and ICU based on original data

| Variables                          | In-hospital LOS      |            |                      |            |                      |            | ICU LOS              |           |                      |           |                      |          |
|------------------------------------|----------------------|------------|----------------------|------------|----------------------|------------|----------------------|-----------|----------------------|-----------|----------------------|----------|
|                                    | Crude (N=106)        |            | Model 1 (N=106)      |            | Model 2 (N=104)      |            | Crude (N=106)        |           | Model 1 (N=106)      |           | Model 2 (N=104)      |          |
|                                    | $\beta$ (95%CI)      | P value    | $\beta$ (95%CI)      | P value    | $\beta$ (95%CI)      | P value    | $\beta$ (95%CI)      | P value   | $\beta$ (95%CI)      | P value   | $\beta$ (95%CI)      | P value  |
| Timing of biliary drainage (days)  | 1.84<br>(1.45, 2.22) | <0.0001*** | 1.40<br>(1.02, 1.78) | <0.0001*** | 1.41<br>(1.02, 1.80) | <0.0001*** | 0.43<br>(0.22, 0.65) | 0.0002*** | 0.44<br>(0.21, 0.68) | 0.0004*** | 0.45<br>(0.19, 0.71) | 0.0010** |
| Timing of biliary drainage (hours) |                      |            |                      |            |                      |            |                      |           |                      |           |                      |          |
| <24                                | Ref                  |            | Ref                  |            | Ref                  |            | Ref                  |           | Ref                  |           | Ref                  |          |
|                                    | 18.45                |            |                      |            |                      |            | 2.99                 |           | 2.95                 |           | 3.07                 |          |
| $\geq 24$                          | (12.43, 24.46)       | <0.0001*** | (5.51, 17.47)        | 0.0003***  | (3.73, 16.90)        | 0.0028**   | (-0.06, 6.03)        | 0.0571    | (-0.41, 6.31)        | 0.0889    | (-0.83, 6.96)        | 0.1263   |
| Timing of biliary drainage (hours) |                      |            |                      |            |                      |            |                      |           |                      |           |                      |          |
| <48                                | Ref                  |            | Ref                  |            | Ref                  |            | Ref                  |           | Ref                  |           | Ref                  |          |
|                                    | 25.58                |            | 20.00                |            | 21.23                |            |                      |           |                      |           | 6.24                 |          |
| $\geq 48$                          | (19.05, 32.11)       | <0.0001*** | (13.18, 26.81)       | <0.0001*** | (14.11, 28.34)       | <0.0001*** | (0.90, 7.95)         | 0.0156*   | (1.23, 9.36)         | 0.0122*   | (1.65, 10.84)        | 0.0092** |

**Notes:** data presented are  $\beta$ s and 95% CIs. Adjust I model adjusts for age, sex, ECI, cardiovascular dysfunction, neurological dysfunction and bile duct stone as etiology. Adjust

II model adjusts for adjust I +bilirubin, ALP, renal dysfunction, hepatic dysfunction, hematological dysfunction, percutaneous drainage and combination of anti-microbial agents.

**Abbreviations:** ECI (vanWalRaven), Elixhauser comorbidity index; ALP, alkaline phosphatase. \*P < 0.05, \*\* P < 0.01 and \*\*\*P < 0.001

**Table S3** Multivariable logistic regression models evaluating the association between timing of biliary drainage and mortality based on original data

| Variables                         | In-hospital mortality |         |                      |         |                      |         |
|-----------------------------------|-----------------------|---------|----------------------|---------|----------------------|---------|
|                                   | Crude (N=106)         |         | Model 1 (N=106)      |         | Model 2 (N=106)      |         |
|                                   | OR (95%CI)            | P value | OR (95%CI)           | P value | OR (95%CI)           | P value |
| Timing of biliary drainage (days) | 1.03<br>(0.95, 1.10)  | 0.4849  | 1.00<br>(0.91, 1.10) | 0.9990  | 0.99<br>(0.89, 1.11) | 0.9202  |

  

| Variables                         | 30-day mortality     |         |                      |         |                      |         |
|-----------------------------------|----------------------|---------|----------------------|---------|----------------------|---------|
|                                   | Crude (N=106)        |         | Model 1 (N=106)      |         | Model 2 (N=106)      |         |
|                                   | OR (95%CI)           | P value | OR (95%CI)           | P value | OR (95%CI)           | P value |
| Timing of biliary drainage (days) | 1.01<br>(0.93, 1.09) | 0.8111  | 1.01<br>(0.91, 1.13) | 0.7797  | 1.03<br>(0.91, 1.18) | 0.6211  |

**Notes:** data presented are ORs and 95% CIs. Adjust I model adjusts for age, sex, ECI, cardiovascular dysfunction, percutaneous drainage and bicarbonate; Adjust II model adjusts for adjust I + renal dysfunction, hepatic dysfunction, hematological dysfunction, neurological dysfunction, percutaneous drainage, bile duct stone as etiology and combination of anti-microbial agents. \*P < 0.05, \*\* P < 0.01 and \*\*\*P < 0.001

**Abbreviations:** ECI (vanWalRaven), Elixhauser comorbidity index.

Figure S1 The heatmap of missing data distribution in each study variables and outcomes  
Dark represents missing data; The levels of the redness represent standardized variable value.

Figure S2 A linear relationship between biliary drainage timing and mortality (a.in-hospital mortality;  
b.30-day mortality) via the smoothing spline, adjusted for age, sex, bicarbonate, bacteremia, and ECI.  
The red line indicates the estimated mortality rate, and the blue lines represent 95% confidence interval.

Figure S3 a. Subgroup analyses of the association between timing of biliary drainage and in-hospital mortality. Each stratification adjusted for all the factors (age, sex, bacteremia, cardiovascular dysfunction, Percutaneous drainage and ECI) except the stratification factor itself.

b. Subgroup analyses of the association between timing of biliary drainage and 30-day mortality. Each stratification adjusted for all the factors (age, sex, bacteremia, cardiovascular dysfunction, Percutaneous drainage and ECI) except the stratification factor itself.



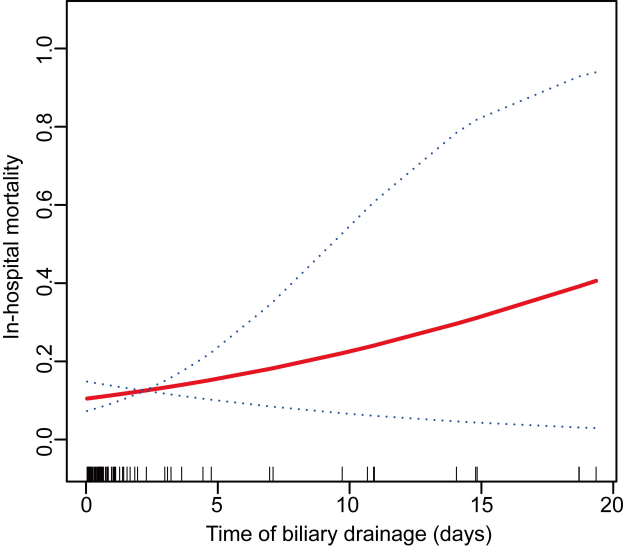

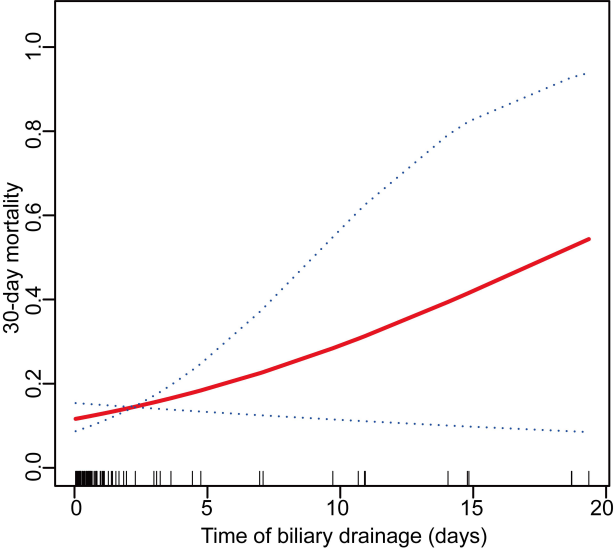

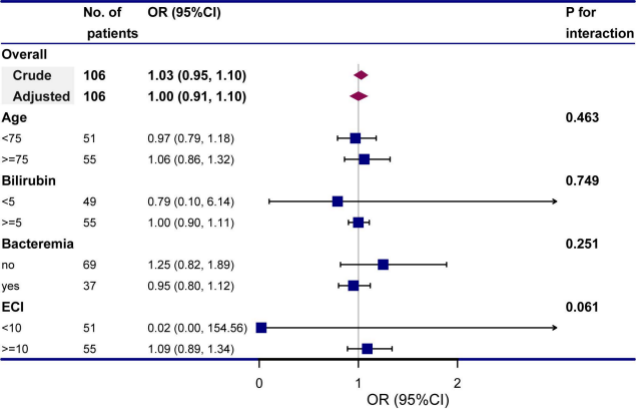



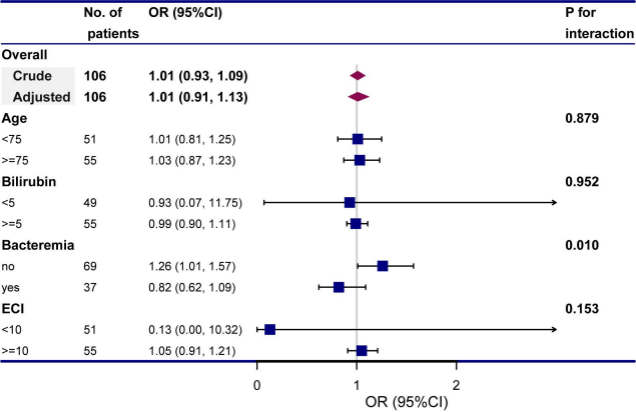

Supplement: Supplementary file 1 [file get_supplementary_file.php]
